# Supplementary material
Source: publisher figshare collection journal article supplement (https://gsapubs.figshare.com/ndownloader/files/22758161)
Supplement: Supplementary file 1 [file 22758161]

# 1 **Data Repository Item**

## 2 **Seismic imaging of subduction zone metamorphism**

3 S. Rondenay, G. A. Abers & P.E. van Keken

4

### 5 **1- ROBUSTNESS AND RESOLUTION OF THE SEISMIC IMAGES**

6

7 The seismic images presented in the paper are produced by multichannel inversion of  
8 scattered teleseismic P waves incident on dense arrays of seismographs (see, e.g.,  
9 Bostock et al., 2001; Rondenay et al., 2005). This approach is similar to the receiver  
10 function method, which has provided some of the earliest samples of slab structure  
11 (Langston, 1979), but extends it in several ways to provide images with higher spatial  
12 resolution. The problem is posed for forward- and back-scattered wavefields generated at  
13 discontinuities in a 2D isotropic medium, with the backprojection operator cast as a  
14 generalized Radon transform (GRT). The approach (hereafter referred to as 2D GRT  
15 inversion) allows for the treatment of incident plane waves from arbitrary backazimuths,  
16 and recovers estimates of material property perturbations (e.g., S velocity) about a  
17 smoothly varying reference model.

18

19 The 2D GRT inversion relies on certain simplifying assumptions and a comprehensive  
20 data sampling to insure the robustness of the images and a high resolution of target  
21 structure. Its applicability and resolving power has been extensively studied for general  
22 applications (Shragge et al., 2001; Rondenay et al., 2005), but some aspects its robustness  
23 and resolving power can only be assessed based on the specific attributes of a given study

24 area. These attributes include the sampling geometry, the geometry of the imaging target,  
25 and the seismic illumination. An assessment of these attributes has already been  
26 conducted for the Cascadia image (see, e.g., Rondenay et al., 2001) and shows that the  
27 structure there is well resolved, but it has not yet been done for Alaska. Here, we  
28 therefore address the applicability and resolution of 2D GRT inversion in southern  
29 Alaska.

30

### 31 **1.1- Target structure and 2-D geometry**

32

33 A central assumption to the 2-D GRT inversion is that scattering occurs at 2-D (i.e., line)  
34 scatterers – a simplification of the problem that stems from the limited availability of  
35 broadband seismic sensors, meaning that dense linear arrays are more easily realizable  
36 than 2-D regional arrays. It is therefore important to determine the 2-D regional strike and  
37 test the validity of the 2-D assumption to ensure that the main features observed in the  
38 final image are not related to mismapping of, or artifacts due to, out-of-plane structure.

39

40 We first determine the strike of the imaging target – in this case the subducted slab. This  
41 is achieved by mapping the slab depth contours in the study area based on the Wadati-  
42 Benioff seismicity map of Ratchkovski and Hansen (2002). These contours are shown in  
43 map view in Figure DR1, and from this we determine an average strike of N240E. The  
44 seismic profiles are therefore constructed along a line with azimuth N150E, as in the  
45 preliminary receiver function study of Ferris et al. (2003).

46

47 Second, we assess the validity of the 2-D assumption. This geometrical requirement is  
48 validated by insuring that two-dimensionality is preserved within a region defined by the  
49 maximum lateral offset (perpendicular to the projection line) from where detectable  
50 scattered signal is produced. It can be shown that for a target at 150 km depth, the  
51 minimum lateral extent on either sides of the station array is of the order of  
52 75 km (Rondenay et al., 2005). Based on the slab contours shown in Figure 1 we see that  
53 the slab does extend laterally over such distance relative to the middle of the array. An  
54 exception to this rule might be encountered at the northwestern end of the line, which is  
55 close to the end of the seismically-defined slab. However, this would affect the image  
56 generated by events illuminating the slab obliquely from the NNE, but as shown in the  
57 next section (see Figure DR2) very few events from that quadrant are used. We also  
58 observe that the southernmost stations are near a bend in the seismically-inferred slab,  
59 which could represent a departure from the 2-D assumption. However, since the low-  
60 velocity layer is at 50km depth in this part of the profile, the minimum required offset on  
61 this structure here is reduced to only 25 km – a requirement that is met by the slab.  
62 Furthermore, images were produced using only subsets of events illuminating the region  
63 from various backazimuthal bins (to be presented in a companion paper) and all show a  
64 consistent signal (thickness and velocity perturbation) for the low-velocity layer between  
65 50-120 km depth. The slab can therefore be considered as a 2-D structure beneath our  
66 study area.

## 67 **1.2- Comprehensive (two-sided) teleseismic illumination**

68

69 Another important factor affecting the robustness of the image is the illumination of the  
70 target structure by incident teleseismic waves. Incomplete illumination inhibits the  
71 focusing of the final image. Of particular importance, in the case of a target structure  
72 such as a dipping subduction slab, is the requirement that the slab be illuminated with  
73 both updip and downdip incidence (Rondenay et al., 2001). This insures that slab-parallel  
74 features (e.g., subduction décollement, oceanic Moho) are detected by both forward and  
75 back scattered waves, respectively. In the case of Alaska, the study area must therefore be  
76 illuminated from both the SSE hemisphere (backazimuths ranging between N60E-  
77 N240E) and from the NNW hemisphere (backazimuths ranging between N240E and  
78 N60E), a requirement that is satisfied by the distribution of events used in the analysis  
79 (see Figure DR2).

80

## 81 **1.3- Dip resolution**

82

83 The dip resolution is controlled by the dip angle of the spatial gradient of total travel time  
84 function  $\nabla T$  (i.e., scattered wave – incident wave), a vector quantity representing the  
85 sensitivity of total travel time to scatterer location (see Bostock et al., 2001; Rondenay et  
86 al., 2005). As shown in Rondenay et al. (2005), the dip resolution at any point of the  
87 model can be determined by plotting the range of vectors  $\nabla T$  that is achieved by  
88 combining all the event-station waveform pairs for that given point. The spherical  
89 representation of vectors  $\nabla T$  at a scattering point is known as an Ewald sphere, and its

90 visual analysis allows a rapid assessment of the dip resolution at that point. In Figure  
91 DR3a, we show an Ewald sphere near the center of the profile (horiz. dist. = 100km,  
92 depth = 80 km in Fig. 2a,c of the paper), where the data set achieves a symmetric and  
93 complete dip resolution, ranging between  $[-90^\circ, 90^\circ]$ .

94 As the range of dip resolution decreases with depth and becomes asymmetric to  
95 the sides of the profile, we must verify that the termination of the low-velocity layer  
96 beneath Alaska is not an artifact due to decreased dip resolution. Figure DR3b shows the  
97 Ewald sphere near the termination point (horiz. dist. = 150 km, depth = 120 km in Fig.  
98 2a,c of the paper), where the data set achieves a dip resolution ranging between  $[-63^\circ,$   
99  $88^\circ]$ . This means that structure dipping to the NNW at an angle  $>60^\circ$  relative to the  
100 surface is not well resolved. In this region of the profile, Wadati-Benioff seismicity  
101 (Ratchkovski and Hansen, 2002) indicates that the slab extends to depths  $\geq 150$  km at an  
102 average dip angle  $\leq 60^\circ$  (although some clusters of events seem to plunge with greater  
103 dips), suggesting that slab parallel structure should be robustly resolvable down to at least  
104 150km depth. Moreover, if the low-velocity layer extended to greater depth with a dip  
105 exceeding that of the maximum resolvable dip, the layer would still be observed below  
106 120km depth, but it would be more diffuse and it would show an erroneous dip – a  
107 common artifact in seismic migration (see, e.g., Yilmaz, 2001). Such continuation of the  
108 low-velocity layer is not observed here below 120 km depth. Based on these arguments,  
109 we can conclude that the termination of the low-velocity layer near  $\sim 120$  km depth in the  
110 NNW portion of the seismic profile is a robust feature.

111

#### 112 **1.4- Volume resolution and tapering of the low-velocity layer**

113

114 Volume resolution depends on the wavelength of the scattered signal considered in the  
115 analysis. The best resolution (i.e., smallest resolvable structure) is determined by the  
116 smallest wavelength ( $\lambda$ ), which for P-to-S scattered waves is of the order of 12-15 km in  
117 the crust and upper mantle, for a high cut-off frequency of 0.3 Hz as that used here in  
118 both Cascadia and Alaska. Higher frequencies are filtered to remove the effects of  
119 scattering from topography at the free-surface (see Rondenay et al., 2005). The average  
120 resolution for forward scattered waves is  $\sim\lambda/2=6-8$  km, whereas that for back-scattered  
121 waves is  $\sim\lambda/4=3-4$  km (see Bostock, 1999; Rychert et al., 2005, 2007). The best  
122 resolution is therefore afforded by back-scattered waves (i.e., free-surface multiples) and  
123 is  $\sim 3-4$  km. This means that scatterers separated by at least 3-4 km can be distinctly  
124 identified and well characterized. This quantity also corresponds to the minimum  
125 thickness resolvable for discrete homogeneous layers.

126

127 In our image of Alaska (Figure 2a,c in the paper), a tapering of the dipping low-velocity  
128 layer is observed for waves illuminating the study area from all available azimuths, and  
129 therefore appears to be a robust feature across the entire imaging volume. However,  
130 previous analyses showed that the layer thickness was constant at  $\sim 20$  km from 50-120  
131 km depth (Ferris et al., 2003). Here, we show that previous and new results may be  
132 reconciled by taking into account the increase in resolution resulting from the inclusion  
133 of back-scattered waves in the imaging technique used in this paper. We define the  
134 sensitivity of seismic waves to velocity gradients as their ability to detect such gradients

135 as discontinuities, and can show that this sensitivity decreases with increased resolution.  
136 Following the definition of volume resolution presented above, a clear discontinuity will  
137 be observed if the gradient occurs over a thickness smaller than  $\lambda/2$  for the transmission  
138 case, and  $\lambda/4$  for the reflection case. Figure DR4 shows a simple model that can explain  
139 the observed discrepancy between an image obtained with only forward-scattered waves  
140 and one that includes back-scattered ones. In this case, the forward transmitted waves see  
141 both the sharp velocity jump and the overlying velocity gradient as discontinuities. These  
142 are close enough in time to produce one single peak. Conversely, the back-scattered  
143 waves only detect the sharp velocity jump. This finding supports a model where the low-  
144 velocity layer comprises two sub-layers: a top layer containing a velocity gradient  
145 occurring over 10 km, that is likely indicative of progressive dehydration with depth; and  
146 a lower layer displaying more uniform low-velocity.

147

### 148 **1.5- Aliasing**

149

150 Aliasing occurs when the scattered signal and/or the weighting function in the imaging  
151 operator are under-sampled, resulting in artifacts that degrade the robustness of the  
152 images. Rondenay et al. (2005) show that aliasing may affect the image between the  
153 surface and a depth corresponding to twice the station spacing. In the case of Alaska,  
154 since the station spacing is  $\sim 10$  km, structure imaged at depths  $>20$  km should therefore  
155 not suffer from aliasing – which applies to the dipping low-velocity layer.

156 **2- THERMAL MODELS**

157

158 The model for Alaska (Figure DR5A) is identical to the reference model shown in Abers  
159 et al. (2006). The lithospheric age at the trench is 38 Ma and the plate subducts with a  
160 speed of 55 mm/yr. The model geometry matches the location of the seismically imaged  
161 low velocity zone. A small component of shear heating corresponding to a stress of  
162 10MPa is applied along the slab-wedge interface, to a depth of 80 km. The subducted  
163 slab is kinematically prescribed. It dynamically drives flow in the wedge, which is  
164 modeled using a dry olivine rheology. To match the observed low attenuation corner in  
165 the tip of the wedge we reduce the effective coupling between slab and wedge to 80 km  
166 depth. The governing equations are solved using a high-resolution finite element model  
167 with local grid resolution in the boundary layers of less than 1 km.

168

169 The thermal model for Cascadia (Figure DR5B) is similar to that of Alaska, but with a  
170 geometry modified to match the seismically observed location of crust and serpentized  
171 corner in the mantle wedge. The incoming plate age is 7.5 Ma and subducts at 35 mm/yr.  
172 No shear heating is assumed along the seismogenic zone.

173

174 **References cited**

175

176 Abers, G.A., van Keken, P.E., Kneller, E.A., Ferris, A., and Stachnik, J.C., 2006, The  
177 thermal structure of subduction zones constrained by seismic imaging: implications for  
178 slab dehydration and wedge flow: Earth Planet. Sci. Lett., 241, 387-397.



- 179 Bostock, M. G., 1999, Seismic imaging of lithospheric discontinuities and continental  
180 evolution: *Lithos*, v. 48, p. 1–16.
- 181 Bostock, M. G., Rondenay, S., and Shragge, J., 2001, Multiparameter two-dimensional  
182 inversion of scattered teleseismic body waves, 1, Theory for oblique incidence: *Journal of*  
183 *Geophysical Research*, v. 106, p. 30,771–30,782.
- 184 Ferris, A., Abers, G. A., Christensen, D. H., and Veenstra, E., 2003, High resolution  
185 image of the subducted Pacific (?) plate beneath central Alaska, 50–150 km depth: *Earth*  
186 *and Planetary Science Letters*, v. 214, p. 575–588.
- 187 Langston, C. A., 1979, Structure under Mount Rainier, Washington, inferred from  
188 teleseismic body waves: *Journal of Geophysical Research*, v. 84, p. 4749–4762.
- 189 Ratchkovski, N., and Hansen, R., 2002, New evidence for segmentation of the Alaska  
190 subduction zone: *Bulletin of the Seismological Society of America*, v. 92, p. 1754–1765.
- 191 Rondenay, S., Bostock, M., and Fischer, K., 2005, Multichannel inversion of scattered  
192 teleseismic body waves: Practical considerations and applicability, in Levander, A., and  
193 Nolet, G., eds, *Seismic Earth: Array analysis of broadband seismograms*: Washington,  
194 DC, American Geophysical Union, *Geophysical Monograph*, v. 157, p. 187–204.
- 195 Rondenay, S., Bostock, M. G., and Shragge, J., 2001, Multiparameter two-dimensional  
196 inversion of scattered teleseismic body waves, 3, Application to the Cascadia 1993 data  
197 set: *Journal of Geophysical Research*, v. 106, p. 30,795–30,808.
- 198 Rychert, C. A., Fischer, K. M., and Rondenay, S., 2005, A sharp lithosphere-  
199 asthenosphere boundary imaged beneath eastern North America: *Nature*, v. 436, p. 542–  
200 545.
- 201 Rychert, C. A., Rondenay, S., and Fischer, K. M., 2007, P-to-S and S-to-P imaging of a

202 sharp lithosphere-asthenosphere boundary beneath eastern North America: Journal of  
203 Geophysical Research, (in press).

204 Shragge, J., Bostock, M., and Rondenay, S., 2001, Multiparameter two-dimensional  
205 inversion of scattered teleseismic body waves, 2, Numerical examples: Journal of  
206 Geophysical Research, v. 106, p. 30,783–30,794.

207 Yilmaz, O., 2001, Seismic data analysis: Tulsa, Oklahoma, Society of Exploration  
208 Geophysicists, 2027p.

209

210

211

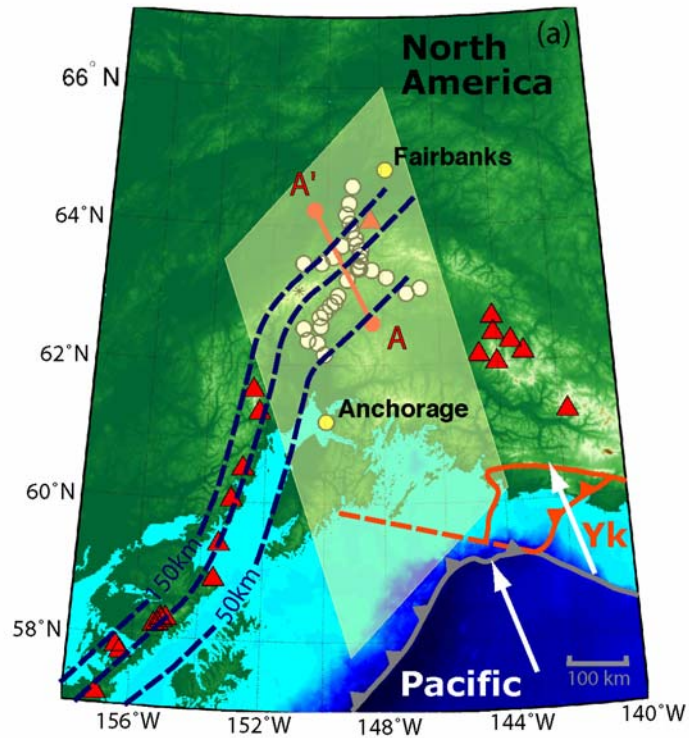

212

213

214

215

Figure DR1. Map of the study area showing the depth contours of the subducted slab based on Wadati-Benioff seismicity (Ratchkovski and Hansen, 2002). Yellow shaded area denotes of the Denali segment of the subducted slab. See caption of Figure 1 (paper) for the description of other symbols and lines.

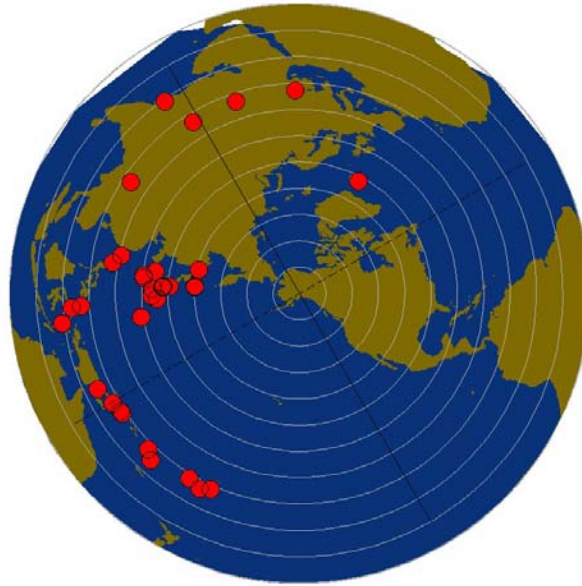

216 Figure DR2. Distribution of teleseismic earthquakes used to produce the seismic image  
 217 of the central Alaska subduction zone (Figure 2a,c of paper). Earthquakes are denoted  
 218 by red circles, and represented in polar projection centered on the study area. Cross lines  
 219 represent the projection of the seismic profile (solid) and the estimated 2-D strike of the  
 slab (dashed). Concentric white circles denote the epicentral distance from the center of  
 the array, by increments of  $10^\circ$ .

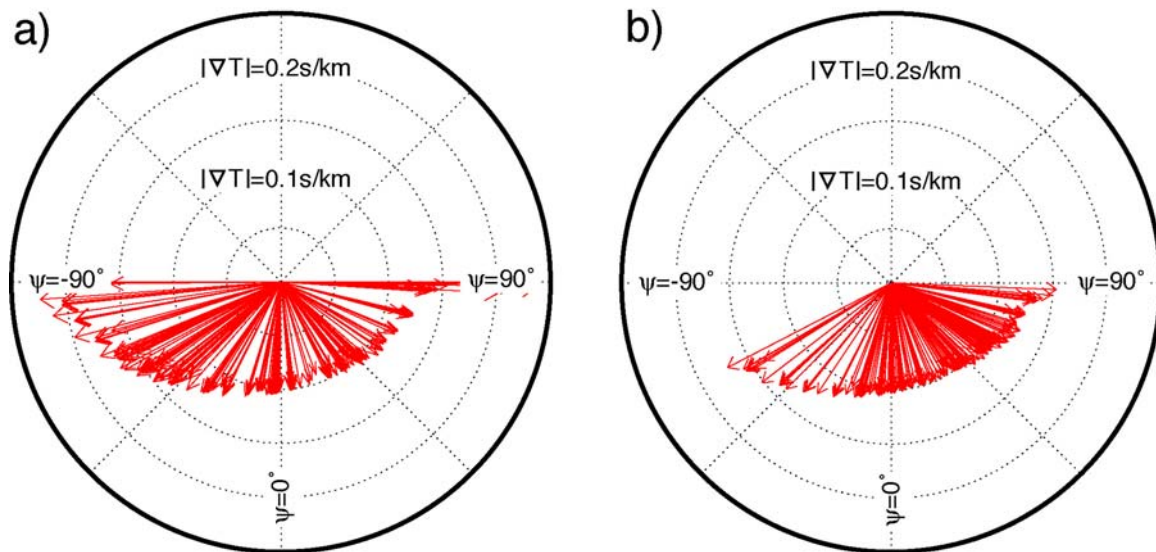

220  
 221 Figure DR3. Ewald sphere analysis for (a) a scatterer located near the center of the  
 222 seismic image (horiz. dist. = 100km, depth = 80 km), and (b) a scatterer located near the  
 223 termination point of the low-velocity layer (horiz. dist. = 150km, depth = 120 km), Red  
 vectors represent the spatial gradient of total travel time function  $\nabla T$ . Dotted lines show  
 the magnitude of these vector  $|\nabla T|$ , and their dip angle  $\psi$ . Surfaces perpendicular to  
 these vectors can be resolved in the seismic image.

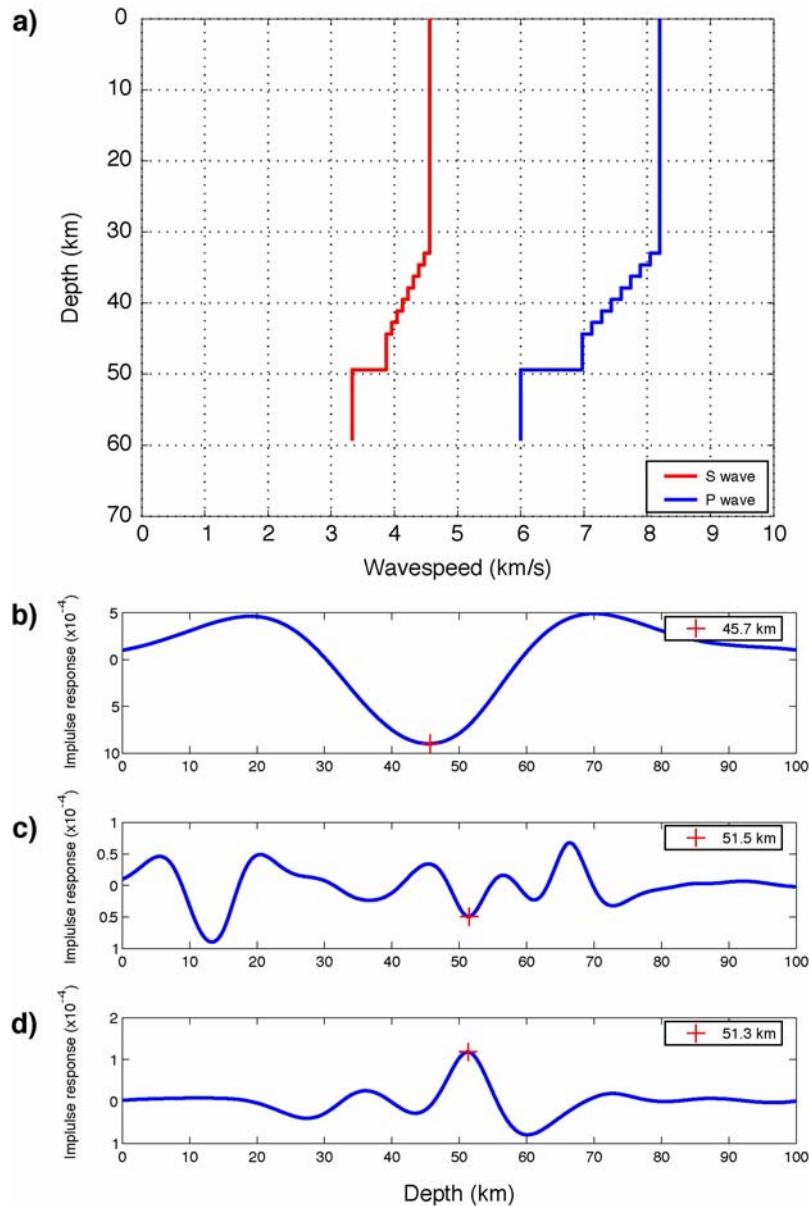

224

225

226

227

228

229

Figure DR4. Synthetic model explaining the discrepancy in resolution between forward and back scattered waves. (a) 1-D velocity model containing a negative velocity gradient at 33km depth, followed by a sudden velocity drop at 50km depth. Synthetic receiver functions are calculated with a reflectivity code, for a wave incident from the left with horizontal slowness  $p=0.03\text{s/km}$  and a dominant period of 4 s. The receiver functions are 1-D depth migrated to phasing depth corresponding to phases (b) forward scattering  $P_s$ , (c) back scattering  $P_{ps}$ , and (d) back scattering  $P_{ss}$ . The main phases associated with the velocity structure in (a) are indicated by a red cross. The forward-scattered mode (b) is sensitive to both the velocity gradient and the velocity drop, whereas the back-scattered modes (c-d) are mainly sensitive to the velocity drop. This different in sensitivity results in a depth discrepancy  $>5\text{km}$ , similar to that observed in the migrated images.

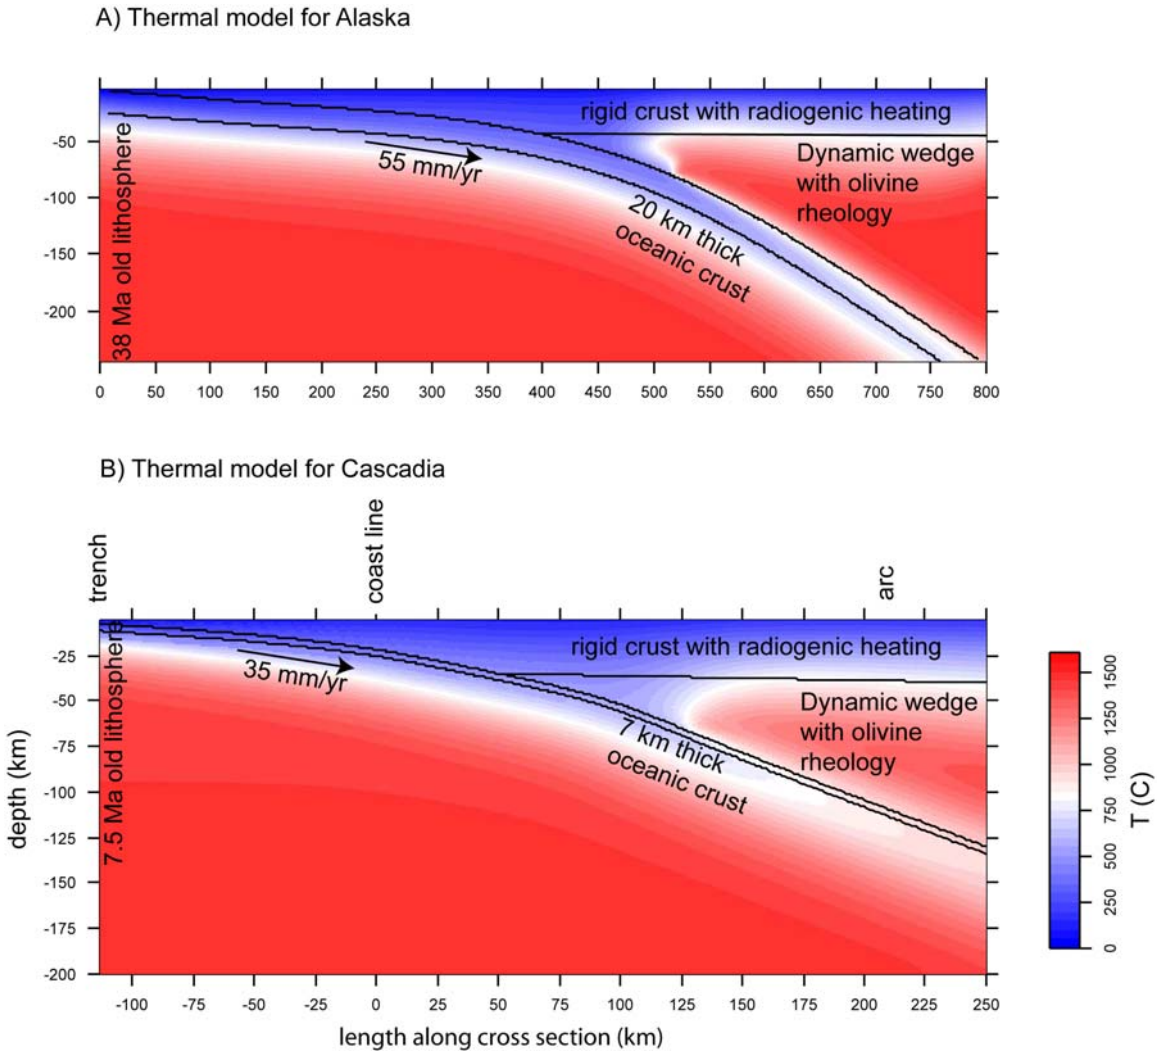

230

231

Figure DR5. Thermal models for the A) Alaska and B) Cascadia transect.
